# Supplementary material
Source: PubMed Central journal article supplement (PMC4331579)

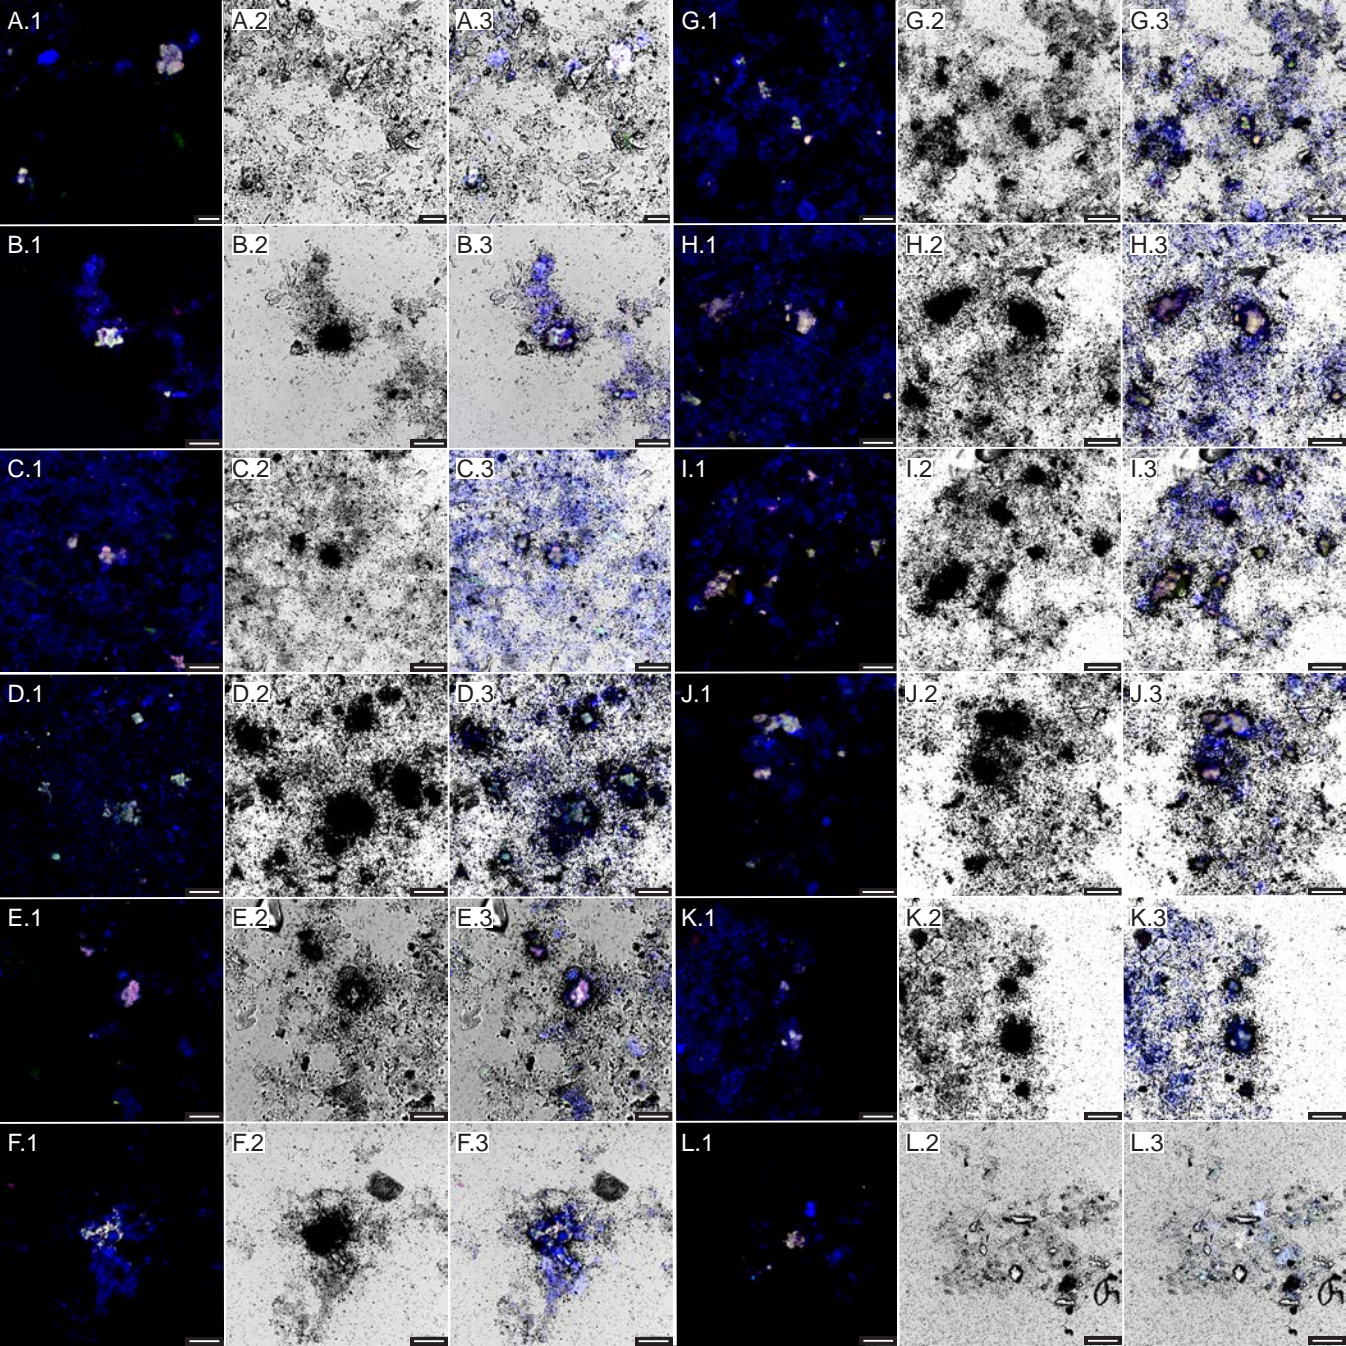

Supplement: ismej2014158x1.pdf [file ismej2014158x1.pdf]

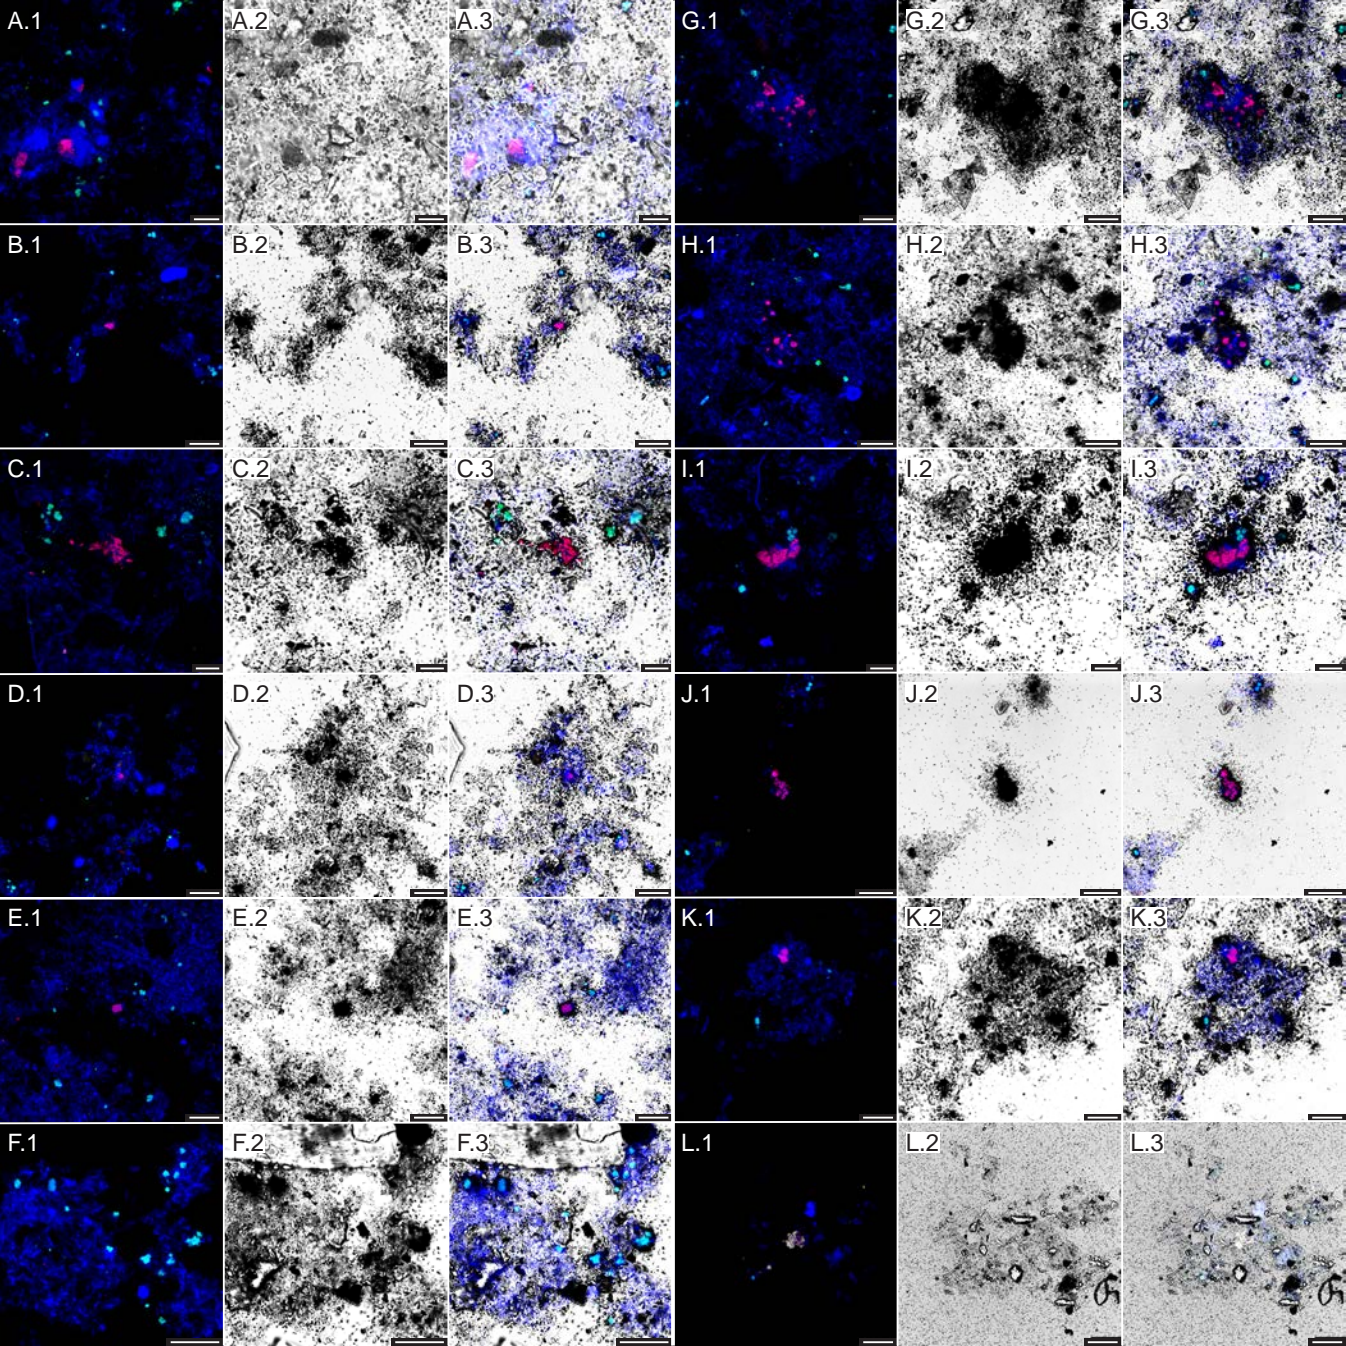

Supplement: ismej2014158x2.pdf [file ismej2014158x2.pdf]
